# Supplementary material
Source: MDPI journal article supplement (https://www.mdpi.com/2076-3417/11/16/7216)
Supplement: s1 [file s1]

# Soft X-ray Microscopy Techniques for Medical and Biological Imaging at TwinMic - Elettra

Alessandra Gianoncelli <sup>1,\*</sup>, Valentina Bonanni <sup>1</sup>, Gianluca Gariani <sup>1</sup>, Francesco Guzzi <sup>1</sup>, Lorella Pascolo <sup>2</sup>, Roberto Borghes <sup>1</sup>, Fulvio Billè <sup>1</sup>, and George Kourousias <sup>1</sup>

<sup>1</sup> Elettra - Sincrotrone Trieste, Strada Statale 14 - km 163,5 in AREA Science Park 34149 Basovizza, Trieste, (Italy); [alessandra.gianoncelli@elettra.eu](mailto:alessandra.gianoncelli@elettra.eu) (A.G.); [valentina.bonanni@elettra.eu](mailto:valentina.bonanni@elettra.eu) (V.B.); [gianluca.gariani@elettra.eu](mailto:gianluca.gariani@elettra.eu) (G.G.); [francesco.guzzi@elettra.eu](mailto:francesco.guzzi@elettra.eu) (F.G.); [roberto.borghes@elettra.eu](mailto:roberto.borghes@elettra.eu) (R.B.); [fulvio.bille@elettra.eu](mailto:fulvio.bille@elettra.eu) (F.B.); [george.kourousias@elettra.eu](mailto:george.kourousias@elettra.eu) (G.K.)

<sup>2</sup> Institute for Maternal and Child Health, IRCCS Burlo Garofolo, via dell'Istria 65/1, 34137 Trieste, Italy.; [lorella.pascolo@burlo.trieste.it](mailto:lorella.pascolo@burlo.trieste.it) (L.P.)

\* Correspondence: [alessandra.gianoncelli@elettra.eu](mailto:alessandra.gianoncelli@elettra.eu);

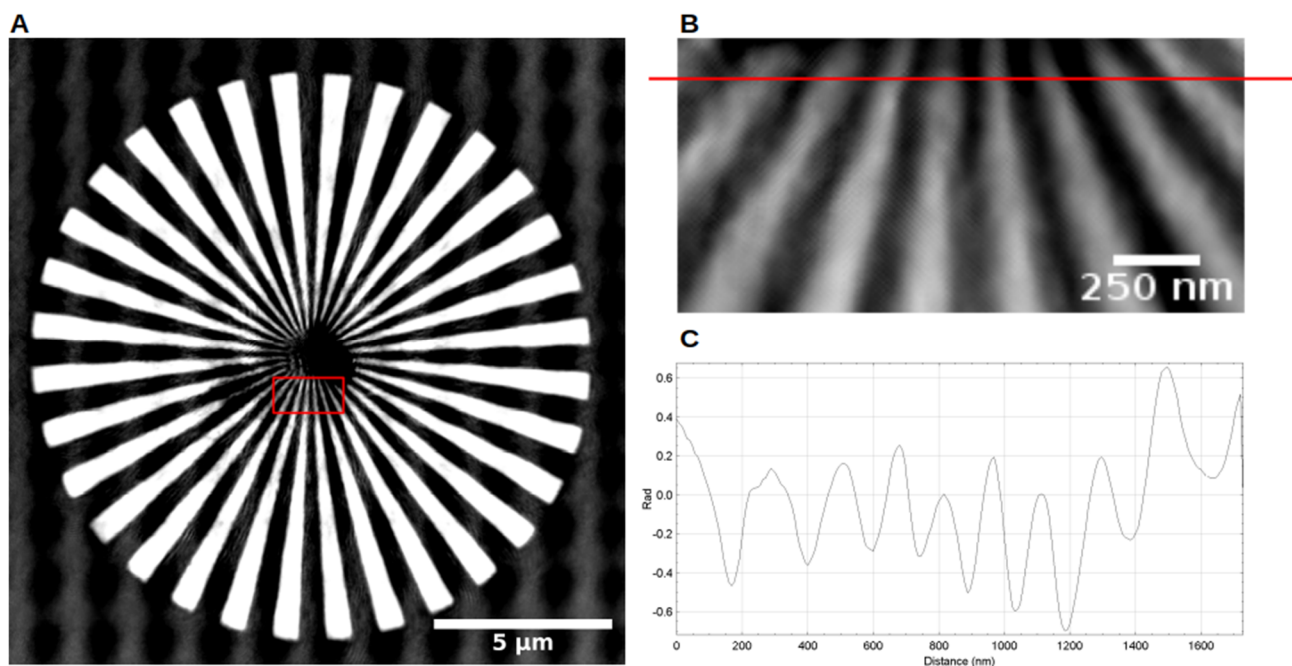

Figure S1. (A) Ptychographic reconstruction of a 20 μm diameter tungsten Siemens Star test pattern. (B) Zoom of the area indicated with the red box in Panel A. (C) Profile graph extracted along the red line indicated in Panel B, showing an achievable spatial resolution better than 50nm.
